# Supplementary material for: Aging is associated with highly defined epigenetic changes in the human epidermis
Source: PubMed Central journal article supplement (PMC3819645; doi:10.1186/1756-8935-6-36), 2013-10-31

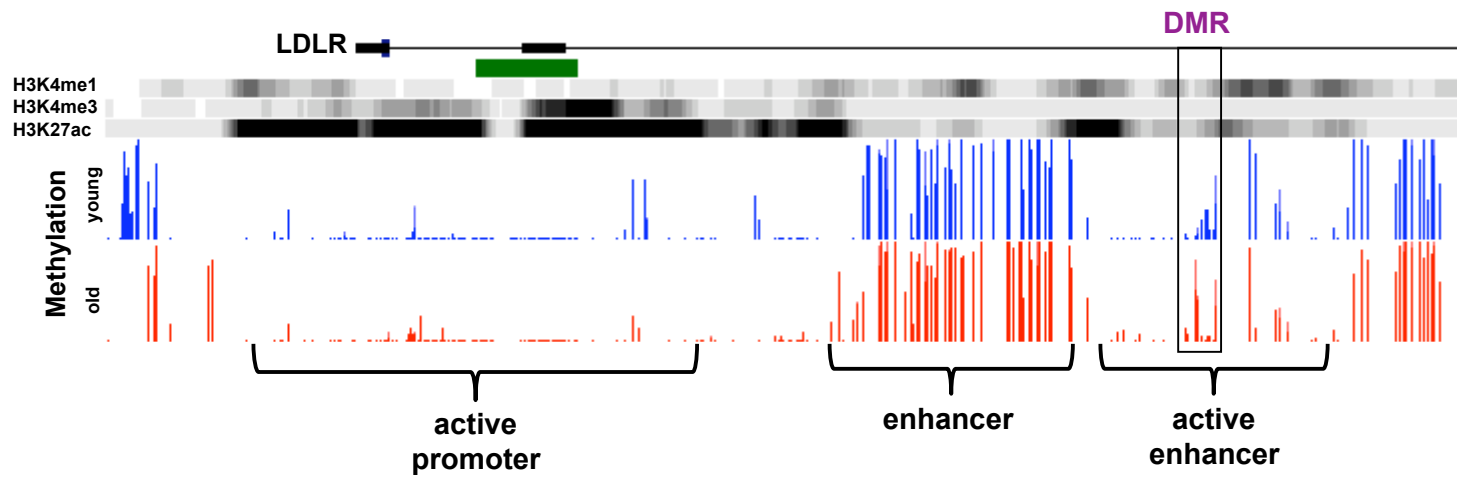

Supplement: 1756-8935-6-36-S4.pdf [file 1756-8935-6-36-S4.pdf]
